# Supplementary material
Source: PubMed Central journal article supplement (PMC3089774)

### **Supplementary Figure Legends:**

**Supp. Fig. 1: PBMCs from ND and T2D patients secrete similar levels of IL-2 in response to stimulation.** PBMCs from ND (white bars) or T2D (black bars) donors were unstimulated or stimulated with  $\alpha$ -CD3 and  $\alpha$ -CD28 for 40 hrs, then analyzed for IL-2 production as a measure of activation. Difference between stimulated cells from ND and T2D donors was insignificant ( $p>0.05$ ). N=12 for each donor cohort.

**Supp. Fig. 2: T cell cytokine production does not correlate with age, BMI, race and sex.** Relationship between age and T cell IL-17, IFN $\gamma$  or IL-4 secretion (Row 1). Relationship between BMI and %CD3<sup>+</sup>CCR4<sup>+</sup>CCR6<sup>+</sup> cells, IL-17, IFN $\gamma$  or IL-4 secretion (Row 2). Row 3 compares African American and white donor samples for %CD3<sup>+</sup>CCR4<sup>+</sup>CCR6<sup>+</sup> cells, IL-17, IFN $\gamma$  or IL-4 secretion. Row 4 compares results from male and female donors for %CD3<sup>+</sup>CCR4<sup>+</sup>CCR6<sup>+</sup> cells, or T cell production of IL-17, IFN $\gamma$  and IL-4. Lack of relationships in Row 1 and 2 was determined by Pearson's correlation. For analyses in rows 3 and 4, results shown include both ND and T2D donor samples and differences were calculated by Mann Whitney U test.

**Supp. Fig. 3: Correlations between BMI and HbA1c for T2D donors.** P value (0.06) was calculated using Pearson's correlation,  $r^2$  value is shown below p value.

# Jagannathan-Bogdan Supplementary Figure 1

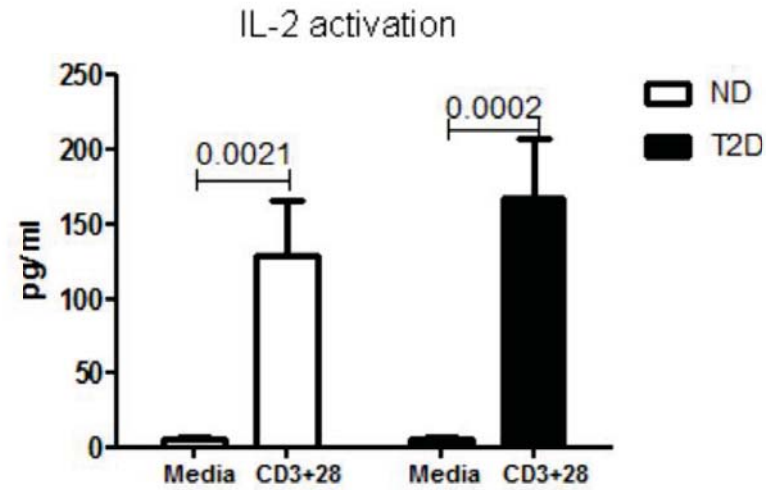

# Jagannathan-Bogdan Supplementary Figure 2

| KEY            | IL-17<br>Age  | IFN $\gamma$<br>Age  | IL-4<br>Age  |
|----------------|---------------|----------------------|--------------|
| CCR4/6<br>BMI  | IL-17<br>BMI  | IFN $\gamma$<br>BMI  | IL-4<br>BMI  |
| CCR4/6<br>Race | IL-17<br>Race | IFN $\gamma$<br>Race | IL-4<br>Race |
| CCR4/6<br>Sex  | IL-17<br>Sex  | IFN $\gamma$<br>Sex  | IL-4<br>Sex  |

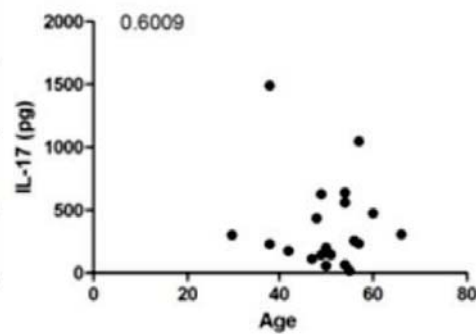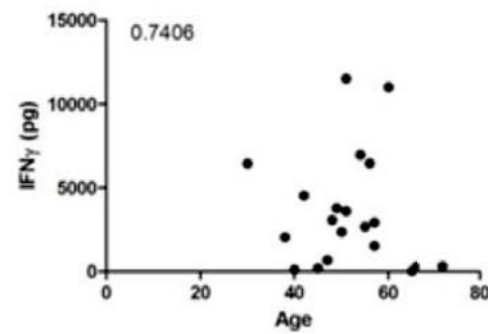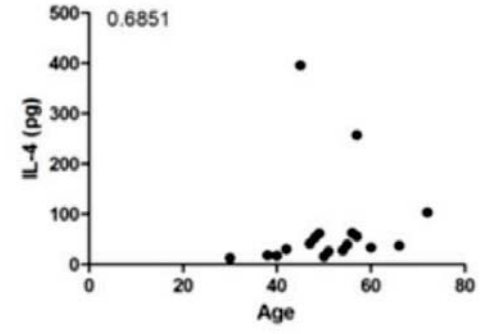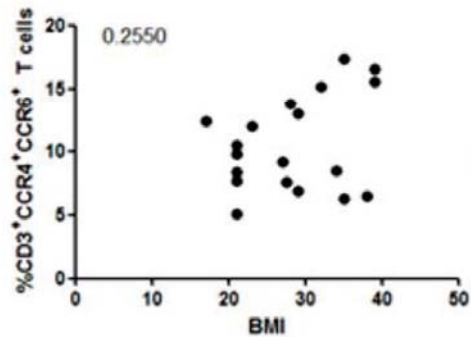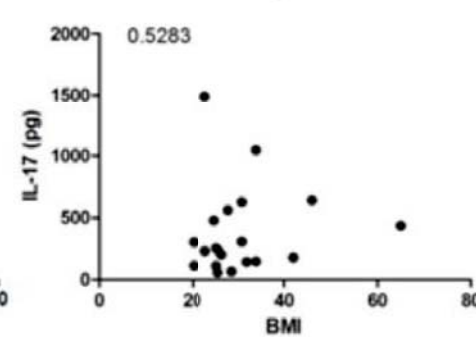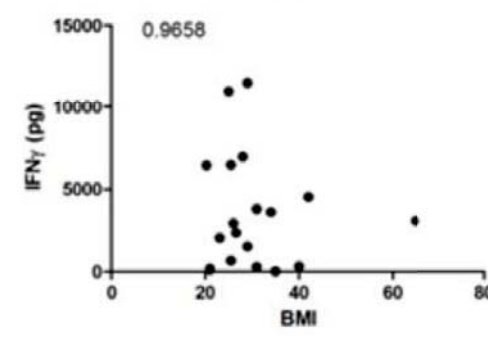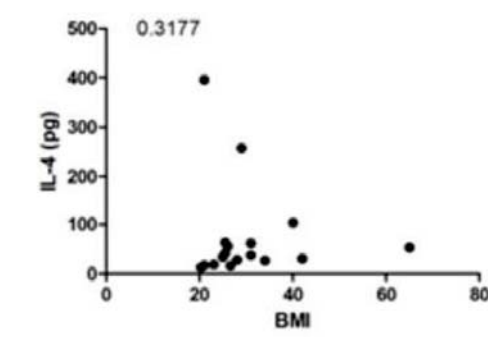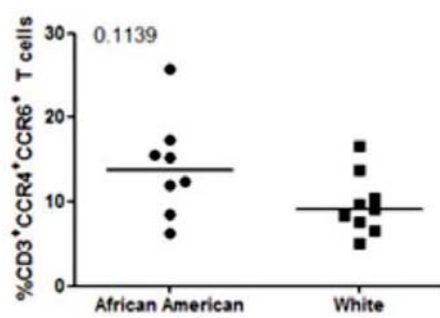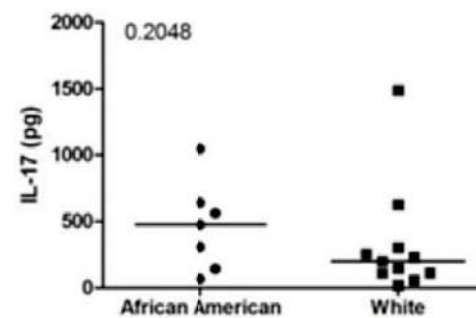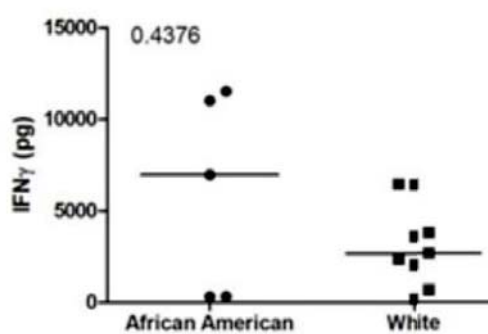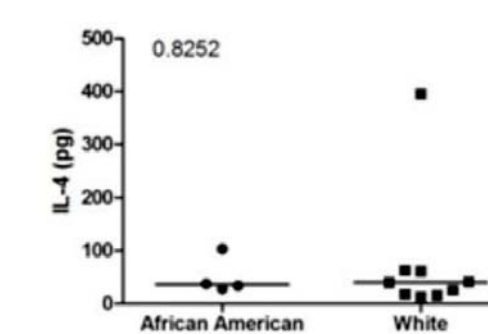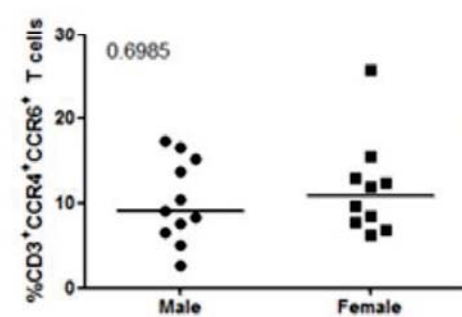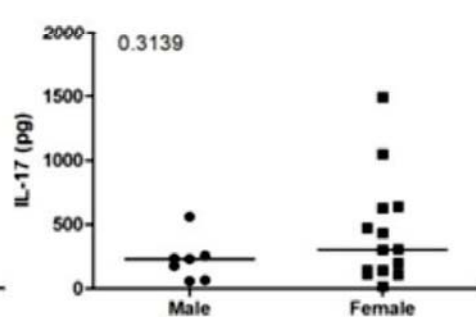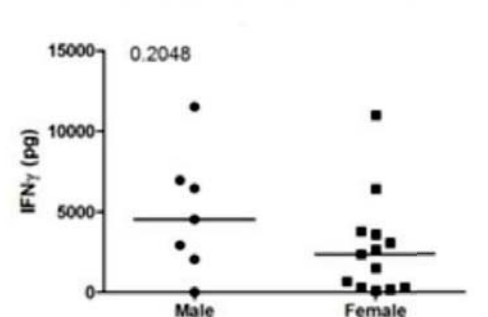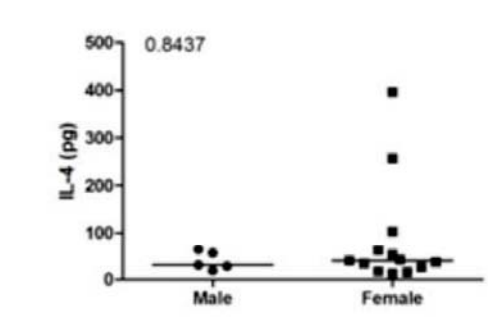

# Jagannathan-Bogdan Supplementary Figure 3

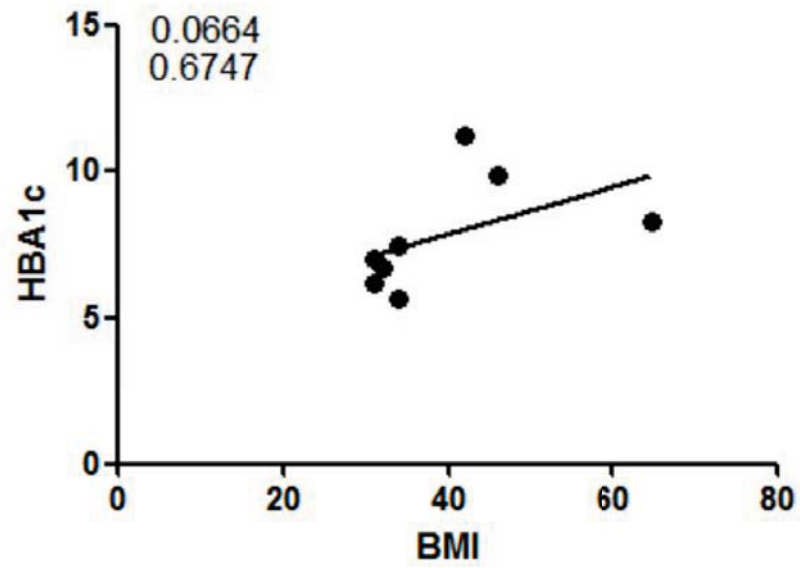

Supplement: NIHMS288919-supplement-Supplementary_Data.pdf [file NIHMS288919-supplement-Supplementary_Data.pdf]
